# Supplementary material
Source: PubMed Central journal article supplement (PMC3591906)
Supplement: AAC.00517-12_zac999101630so1.pdf [file AAC.00517-12_zac999101630so1.pdf]

Suppl. Fig. 1 Amino acid changes in *rdxA* gene of Mtz<sup>R</sup> isolates

1

|            |                         |            |                         |            |             |      |            |            |
|------------|-------------------------|------------|-------------------------|------------|-------------|------|------------|------------|
| RdxA_26695 | MKFLDQEKRR              | QLLNER--HS | CKMFD <sup>S</sup> HYEF | SST-ELEEIA | EIARLSPSSY  | N--- | TQPWHF     | VMVTDK-DLK |
| 42_R       | MKFLDQEKRR              | QLLNER--HS | CKMFD <sup>S</sup> HYEF | SST-ELEEIA | EIARLSPSSY  | N--- | TQPWHF     | VMVTNK-DLK |
| 127_R      | MKFLDQEKRR              | QLLNER--HS | CKMFD <sup>S</sup> HYEF | SST-ELEEIA | EIARLSPSSY  | N--- | TQPWHF     | VMVTNK-DLK |
| 260B_R     | MKFLDQEKRR              | QLLNER--HS | CKMFD <sup>S</sup> HYEF | SST-ELEEIA | EIARLSPSSY  | N--- | TQPWHF     | VMVTNK-DLK |
| 48_R       | MKFLDHEKRR              | QLLNER--HS | CKMFD <sup>S</sup> HYEF | SST-ELEEIA | EIARLLPSSY  | N--- | TQPWHF     | VMVTNK-DLK |
| 103_R      | MKFLDHEKRR              | QLLNER--HS | CKMFD <sup>S</sup> HYEF | SST-ELEEIA | EIARLSPSSY  | N--- | TQPWHF     | VMVTNK-DLK |
| 250_R      | MKFLDQEKRR              | QLLNER--HS | CKMFD <sup>S</sup> HYEF | SST-ELEEIA | EIARLSPSSY  | N--- | TQPWHF     | VMVTNK-DLK |
| 104_R      | MKFLDHEKRR              | QLLNER--HS | CKMFD <sup>S</sup> HYEF | SST-ELEEIA | EIARLSPSSY  | N--- | TQPWHF     | VMVTNK-DLK |
| 261_R      | MKFLDQEKRR              | QLLNER--HS | CKMFD <sup>S</sup> HYEF | SST-ELEEIA | EIARLLPSSY  | N--- | TQPWHF     | VMVTNK-DLK |
| 97_R       | MKFLDHEKRR              | QLLNEH--HS | CKMFD <sup>S</sup> RYEF | SST-ELEEIA | EIARLSPSSY  | N--- | TQPWHF     | VMVTNK-DLK |
| 245_R      | MKFLDHEKRR              | QLLNEH--HS | CKMFD <sup>S</sup> HYEF | SST-ELEEIA | EIARLSPSSY  | N--- | TQPWHF     | VMVTNK-DLK |
| 130_R      | MKFLDHEKRR              | QLLNER--HS | CKMFD <sup>S</sup> HYEF | SST-ELEEIA | EIARLSPSSY  | N--- | TQPWHF     | VMVTNK-DLK |
| 265_R      | MKFLDHEKRR              | QLLNER--HS | CKMFD <sup>S</sup> HYEF | SST-ELEEIA | EIARLSPSSY  | N--- | TQPWHF     | VMVTNK-DLK |
| 110_R      | MKFLDHEKRR              | QLLNER--HS | CKMFD <sup>S</sup> HYEF | SSE-ELEEIA | EIARLSPSSY  | N--- | TQPWHF     | VMVTNK-DLK |
| 114_R      | MKFLD <sup>H</sup> -KRR | QLLNER--HS | CKMFD <sup>S</sup> HYEF | SSE-ELEEIA | EIARLSPSSY  | N--- | TQPWHF     | VMVTNK-DLK |
| 122_R      | MKFLDHEKRR              | QLLNER--HS | CKMFD <sup>S</sup> HYEF | SSE-ELEEIA | EIARLSPSSY  | N--- | TQPWHF     | VMVTNK-DLK |
| 71_R       | MKFLDHEKRR              | QLLNEH--HS | CKMFD <sup>S</sup> HYEF | SSA-ELEEIA | EIARLSPSSY  | N--- | TQPWHF     | VMVTNK-DLK |
| 100_R      | MKFLDHEKRR              | QLLNER--HS | CKMFD <sup>S</sup> HYEF | SST-ELEEIA | EIARLSPSSY  | N--- | TQPWHF     | VMVTNK-DLK |
| 93_R       | MKFLDQEKRR              | QLLNER--HS | CKMFD <sup>S</sup> HYEF | SSE-ELEEIA | EIARLSPSSY  | N--- | TQPWHF     | VMVTNK-DLK |
| 83_R       | MKFLDHEKRR              | QLLNER--HS | CKMFD <sup>S</sup> HYEF | SSE-ELEEIA | EIARLSPSSY  | N--- | TQPWHF     | VMVTNK-DLK |
| 205_R      | MKFLDHEKRR              | QLLNER--HS | CKMFD <sup>S</sup> HYEF | SSE-ELEEIA | EIARLSPSSY  | N--- | TQPWHF     | VMVTNK-DLK |
| 264_R      | MKFLDQEKRR              | QLLNER--HS | CKMFD <sup>S</sup> HYEF | SST-ELEEIA | EIARLSPSSY  | N--- | TQPWHF     | VMVTNK-DLK |
| 231_R      | MKFLDHEKRR              | QLLNER--HS | CKMFD <sup>S</sup> HYEF | SGA-ELEEIA | EIARLSPSSY  | N--- | TQPWHF     | VMVTNK-DLK |
| 117_R      | MKFLDREKRR              | QLLNER--H- | -----HYEF               | SSE-ELEEIA | EIARLSPSSY  | N--- | TQPWHF     | VMVTNK-DLK |
| 115_R      | MKFLDHEKRR              | QLLNER--HS | CKMFD <sup>S</sup> HYEF | SSE-ELEEIA | EIARLSPSSY  | N--- | TQPWHF     | VMVTNK-DLK |
| 99_R       | MKFLDHEKRR              | QLLNER--HS | CKMFD <sup>S</sup> HYEF | SSE-ELEEIA | EIARLSPSSY  | N--- | TQPWHF     | VMVTNK-DLK |
| 270_R      | MKFLDHEKRR              | QLLNEH--HS | CKMFD <sup>S</sup> HYEF | SSE-ELEEIA | EIARLSPSSY  | N--- | TQPWHF     | VMVTNK-DLK |
| 263_R      | MKFLDHEKRR              | QLLNEH--HS | CKMFD <sup>S</sup> RYEF | SST-ELEEIA | EIARLSPSSY  | N--- | TQPWHF     | VMVTNK-DLK |
| 239_R      | MKFLDHEKRR              | QLLNER--HS | CKMFD <sup>S</sup> HYEF | SST-ELEEIA | EIARLSPSSY  | N--- | TQPWHF     | VMVTNK-DLK |
| 123_R      | MKFLDHEIKK              | TITERA--PF | LQDVQ <sup>P</sup> -LVF | HRIRRRNRQ  | TIAKL-----  | ---  | LQHPAM     | AFCDGY-GFK |
| 121_R      | MEYFWITKKE              | DNYTSAILAR | CLT-----AI              | MSS-L--VK  | NKKSLSKSPGY | ---  | ROALTTPNH- | GILWLPIRIK |
| 244_R      | MKFLDHEKRR              | QLLNER--HS | CKMFD <sup>S</sup> HYEF | SST-ELEEIA | EIARLSPSSY  | N--- | TQPWHF     | VMVTNK---K |
| 269_R      | MKFLDHEKRR              | QLLNER--HS | CKMFD <sup>S</sup> HYEF | SSE-ELEEIA | EIARLSPSSY  | N--- | TQPWHF     | VMVTNK-DLK |
| 249_R      | MKFLD <sup>H</sup> KKRR | QLLNER--HS | CKMFD <sup>S</sup> HYEF | SST-ELEEIA | EIARLSPSSY  | N--- | TQPWHF     | VMVTNLIRIK |

71

|            |                         |                         |                                       |                                      |            |                                      |                                      |
|------------|-------------------------|-------------------------|---------------------------------------|--------------------------------------|------------|--------------------------------------|--------------------------------------|
| RdxA_26695 | KQIAAHSYFN              | EEMIKSA-SA              | LMVVC <sup>S</sup> SLRPS              | ELLPHGHYMQ                           | NLYPESYKVR | VIP <sup>S</sup> FAQMLG              | VRFNHS <sup>M</sup> QRL              |
| 42_R       | KQIAAHSYFN              | EEMIKSA-SA              | LMVVC <sup>S</sup> SLKPS              | ELLPHSHYMQ                           | NLYPESYKVR | VIP <sup>S</sup> FAQMLG              | VRFNHS <sup>M</sup> QKL              |
| 127_R      | KQIAAHSYFN              | EEMIKSA-SA              | LMVVC <sup>S</sup> SLKPS              | ELLPHSHYMQ                           | NLYPESYKVR | VIP <sup>S</sup> FAQMLG              | VRFNHS <sup>M</sup> QKL              |
| 260B_R     | KQIAAHSYFN              | EEMIKSA-SA              | LMVVC <sup>S</sup> SLKPS              | ELLPHSHYMQ                           | NLYPESYKVR | VIP <sup>S</sup> FAQMLG              | VRFNHS <sup>M</sup> QKL              |
| 48_R       | KQIAAHSYFN              | EEMIKSA-SA              | LMVVC <sup>S</sup> SLKPS              | ELLPHSHYMQ                           | NLYPESYKVR | VIP <sup>S</sup> FAQMLG              | VRFNHS <sup>M</sup> QKL              |
| 103_R      | KQIAAHSYFN              | EEMIKSI-SA              | LMVVC <sup>S</sup> SLKPS              | ELLPHSHYMQ                           | NLYPESYKVR | VIP <sup>S</sup> FAQMLG              | VRFNHS <sup>M</sup> QKL              |
| 250_R      | KQIAAHSYFN              | EEMIKSA-SA              | LMVVC <sup>S</sup> SLKPS              | ELLPHSHYMQ                           | NLYPESYKVR | VIP <sup>S</sup> FAQMLG              | VRFNHS <sup>M</sup> QKL              |
| 104_R      | KQIAAHSYFN              | EEMIKSA-SA              | LMVVC <sup>S</sup> SLKPS              | ELLPHSHYMQ                           | NLYPESYKVR | VIP <sup>S</sup> FAQMLG              | VRFNHS <sup>M</sup> QKL              |
| 261_R      | KQIAAHSYFN              | EEMIKSA-SA              | LMVVY <sup>S</sup> SLKPS              | ELLPHSHYMQ                           | NLYPESYKVR | VIP <sup>S</sup> FAQMLG              | VRFNHS <sup>M</sup> QKL              |
| 97_R       | KQIAAHSYFN              | EEMIKSA-SA              | LMVVC <sup>S</sup> SLKPS              | ELLPHSHYMQ                           | NLYPESYKVR | VIP <sup>S</sup> FAQMLG              | VRFNHS <sup>M</sup> QKL              |
| 245_R      | KQIAAHSYFN              | EEMIKSA-SA              | LMVVC <sup>S</sup> SLKPS              | ELLPHSHYMQ                           | NLYPESYKVR | VIP <sup>S</sup> F <sup>T</sup> QMLG | VRFNHS <sup>M</sup> QKL              |
| 130_R      | KQIAAHSYFN              | EEMIKSA-SA              | LMVVC <sup>S</sup> SLKPS              | ELLPT <sup>S</sup> HYMQ              | NLYPESYKVR | VIP <sup>S</sup> FAQMLG              | VRFNHS <sup>M</sup> QKL              |
| 265_R      | KQIAAHSYFN              | EEMIKSA-SA              | LMVVC <sup>S</sup> SLKPS              | ELLPHSHYMQ                           | NLYPESYKVR | VIP <sup>S</sup> FAQMLG              | VRFNHS <sup>M</sup> QKL              |
| 110_R      | KQIAAHSYFN              | EEMIKST-SA              | LMVVC <sup>S</sup> SLKPS              | ELLPHSHYMQ                           | NLYPESYKVR | VIP <sup>S</sup> F <sup>T</sup> QMLG | VRFNHS <sup>M</sup> QKL              |
| 114_R      | KQIAAHSYFN              | EEMIKSA-SA              | LMVVC <sup>S</sup> SLKPS              | ELLPHSHYMQ                           | NLYPESYKVR | VIP <sup>S</sup> FAQMLG              | VRFNHS <sup>M</sup> QKL              |
| 122_R      | KQIAAHSYFN              | EEMIKSA-SA              | LMVVC <sup>S</sup> SLKPS              | ELLPHSHYMQ                           | NLYPESYKVR | VIP <sup>S</sup> F <sup>T</sup> QMLG | VRFNHS <sup>M</sup> QKL              |
| 71_R       | KQIAAHSYFN              | EEMIKSA-SA              | LMVVC <sup>S</sup> SLKPS              | ELLPHSHYMQ                           | NLYPESYKVR | VIP <sup>S</sup> FAQMLG              | VRFNHS <sup>M</sup> QKL              |
| 100_R      | KQIAAHSYFN              | EEMIKSA-SA              | LMVVC <sup>S</sup> SLKPS              | ELLPT <sup>G</sup> H <sup>Y</sup> MQ | NLYPESYKVR | VIP <sup>S</sup> F <sup>T</sup> QMLG | VRFNHS <sup>M</sup> QKL              |
| 93_R       | KQIAAHSYFN              | EEMIKSA-SA              | LMVVC <sup>S</sup> SLKPS              | ELLPHSHYMQ                           | NLYPESYKVR | VIP <sup>S</sup> FAQMLG              | VRFN <sup>H</sup> G <sup>M</sup> QKL |
| 83_R       | KQIAAHSYFN              | EEMIKSA-SA              | LMVVC <sup>S</sup> SLKPS              | ELLPHSHYMQ                           | NLYPESYKVR | VIP <sup>S</sup> FAQMLG              | VRFNHS <sup>M</sup> QKL              |
| 205_R      | KQIAAHSYFN              | EEMIKSA-SA              | LMVVC <sup>S</sup> SLKPS              | ELLPHSHYMQ                           | NLYPESYKVR | VIP <sup>S</sup> FAQMLG              | VRFNHS <sup>M</sup> QKL              |
| 264_R      | KQIAAHSYFN              | EEMIKSA-SA              | LIV <sup>V</sup> C <sup>S</sup> SLKPS | ELLPHSHYMQ                           | NLYPESYKVR | VIP <sup>S</sup> FAQMLG              | VRFNHS <sup>M</sup> QKL              |
| 231_R      | KQIAAHSYFN              | EEMIKSA-SA              | LMVVC <sup>S</sup> SLKPS              | ELLPHSHYMQ                           | NLYPESYKVR | VIP <sup>S</sup> FAQMLG              | VRFNHS <sup>M</sup> QKL              |
| 117_R      | KQIAAHSYFN              | EEMIKSA-SA              | LMVVC <sup>S</sup> SLKPS              | ELLPHSHYMQ                           | NLYPESYKVR | VIP <sup>S</sup> F <sup>T</sup> QMLG | VRFNHS <sup>M</sup> QKL              |
| 115_R      | KQIAAHSYFN              | EEMIKSA-SA              | LMVVC <sup>S</sup> SLKPS              | ELLPHSHYMQ                           | NLYPESYKVR | VIP <sup>S</sup> F <sup>T</sup> QMLG | VRENHS <sup>M</sup> QKL              |
| 99_R       | KTNC <sup>S</sup> AQLFQ | RDDKRF <sup>S</sup> VNG | GML----FKT                            | -RVVTA <sup>P</sup> LHA              | KPLSGVLSQ- | SDPVFR <sup>S</sup> NAW              | R----EIQ <sup>P</sup> Q              |
| 270_R      | KTNC <sup>S</sup> TQLFQ | RDDKRF <sup>S</sup> VNG | GML----FKT                            | RVVTA <sup>P</sup> LHA               | KSLSGVLSQ- | SDPLFR <sup>S</sup> NAW              | R----EIQ <sup>P</sup> Q              |
| 263_R      | KTNC <sup>S</sup> TQLF- | RDDKRF <sup>G</sup> VNG | GML----FKT                            | QRV <sup>V</sup> TA <sup>P</sup> LHA | KSLSGVLSQ- | GDPV <sup>F</sup> H <sup>S</sup> NAW | R----EIQ <sup>P</sup> Q              |
| 239_R      | KQIAV <sup>H</sup> SYFN | EEMIKSA-SA              | LMVVC <sup>S</sup> SLKPS              | ELLPHSHYMQ                           | NLISGVLSQ- | SDPLFR <sup>S</sup> NAW              | R----EIQ <sup>P</sup> Q              |
| 123_R      | KTNC <sup>S</sup> AQLFQ | RDDKCF <sup>S</sup> VNG | GMLF----KI                            | -RVATA <sup>P</sup> LHA              | KPLSGVLSQ- | SDPV <sup>F</sup> C <sup>S</sup> NAW | R----EIQ <sup>P</sup> Q              |
| 121_R      | NK <sup>L</sup> QRTAILM | KRLKALR---              | -RWWYI----                            | -LNPAS <sup>C</sup> YRT              | A-----     | ---ITCK <sup>T</sup> TSI             | R----SLIK <sup>S</sup>               |
| 244_R      | NK <sup>L</sup> QCTAILM | KRLKALQ---              | -RWWYA----                            | -LNLAS <sup>C</sup> YRI              | A-----     | ---ITCK <sup>T</sup> TFI             | R----SLIK <sup>S</sup>               |
| 269_R      | NK <sup>L</sup> QRTAILM | KRLKALQ---              | -RWWYA----                            | -LNPAS <sup>C</sup> YRI              | A-----     | ---ITCK <sup>T</sup> TSI             | R----SLIK <sup>L</sup>               |
| 249_R      | NK <sup>L</sup> QRTAISM | KRLKALR---              | -RWWYA----                            | -LNLAS <sup>C</sup> YRI              | A-----     | ---ITCK <sup>T</sup> TSI             | R----SLIK <sup>L</sup>               |
